# Supplementary material for: Establishment of a Pretreatment Nomogram to Predict the 6-Month Mortality Rate of Patients with Advanced Biliary Tract Cancers Undergoing Gemcitabine-Based Chemotherapy
Source: MDPI journal article supplement (doi:10.3390/cancers13133139), 2021-06-23
Supplement: s1 [file s1]

# Supplementary Material: Establishment of a Pretreatment Nomogram to Predict the 6-Month Mortality Rate of Patients with Advanced Biliary Tract Cancers Undergoing Gemcitabine-based Chemotherapy

Chiao-En Wu, Wen-Kuan Huang, Wen-Chi Chou, Chia-Hsun Hsieh, John Wen-Cheng Chang, Cheng-Yu Lin, Chun-Nan Yeh and Jen-Shi Chen

**Table S1.** Characteristics of patients stratified by chemotherapy regimens.

| Characteristic                   | G alone ( <i>n</i> = 43) | G-based double C/T ( <i>n</i> = 159) | <i>p</i> -value |
|----------------------------------|--------------------------|--------------------------------------|-----------------|
| Age (years), median (IQR)        | 66.0 (15.0)              | 62.0 (14.0)                          | 0.023           |
| ≤65                              | 20 (46.5)                | 99 (62.3)                            | 0.063           |
| >65                              | 23 (53.5)                | 60 (37.7)                            |                 |
| Gender                           |                          |                                      | 0.351           |
| Male                             | 19 (44.2)                | 83 (52.2)                            |                 |
| Female                           | 24 (55.8)                | 76 (47.8)                            |                 |
| ICD-10 cancer site               |                          |                                      | <0.001          |
| C22.1-ICCA                       | 14 (32.6)                | 106 (66.7)                           |                 |
| C23/C24.9-GB/others              | 10 (23.3)                | 27 (17.0)                            |                 |
| C24.0-ECCA                       | 17 (39.5)                | 21 (13.2)                            |                 |
| C24.1-Ampullary                  | 2 (4.7)                  | 5 (3.1)                              |                 |
| Performance score                |                          |                                      | 0.004           |
| 0/1                              | 31 (72.1)                | 142 (89.3)                           |                 |
| 2/3                              | 12 (27.9)                | 17 (10.7)                            |                 |
| NLR, median (IQR)                | 4.06 (5.03)              | 3.88 (3.56)                          | 0.510           |
| <3.95                            | 21 (48.8)                | 83 (52.2)                            | 0.695           |
| ≥3.95                            | 22 (51.2)                | 76 (47.8)                            |                 |
| MLR, median (IQR)                | 0.35 (0.40)              | 0.37 (0.31)                          | 0.541           |
| <0.39                            | 24 (55.8)                | 82 (51.6)                            | 0.621           |
| ≥0.39                            | 19 (44.2)                | 77 (48.4)                            |                 |
| PLR, median (IQR)                | 184.37 (123.95)          | 152.60 (121.94)                      | 0.106           |
| <147.2                           | 14 (32.6)                | 70 (44.0)                            | 0.176           |
| ≥147.2                           | 29 (67.4)                | 89 (56.0)                            |                 |
| Albumin (g/dL), median (IQR)     | 3.34 (0.90)              | 3.80 (0.92)                          | 0.106           |
| <3.5                             | 23 (59.0)                | 45 (31.9)                            | 0.002           |
| ≥3.5                             | 16 (41.0)                | 96 (68.1)                            |                 |
| ALT (U/L), median (IQR)          | 37.0 (46.0)              | 30.0 (35.3)                          | 0.348           |
| ≤36                              | 21 (48.8)                | 97 (61.4)                            | 0.138           |
| >36                              | 22 (51.2)                | 61 (38.6)                            |                 |
| Bilirubin (mg/dL), median (IQR)  | 1.15 (1.10)              | 0.70 (0.70)                          | 0.002           |
| ≤1.3                             | 23 (54.8)                | 121 (77.1)                           | 0.004           |
| >1.3                             | 19 (45.2)                | 36 (22.9)                            |                 |
| ALP (U/L), median (IQR)          | 255.00 (255.00)          | 159.00 (153.00)                      | 0.008           |
| ≤94                              | 6 (14.0)                 | 38 (23.9)                            | 0.161           |
| >94                              | 37 (86.0)                | 121 (76.1)                           |                 |
| Creatinine (mg/dL), median (IQR) | 0.62 (0.48)              | 0.65 (0.32)                          | 0.591           |
| ≤1.27                            | 40 (93.0)                | 154 (96.9)                           | 0.371           |

|                            |                 |                 |        |
|----------------------------|-----------------|-----------------|--------|
| >1.27                      | 3 (7.0)         | 5 (3.1)         |        |
| CA199 (U/mL), median (IQR) | 550.80 (960.10) | 165.0 (1686.43) | 0.038  |
| <37                        | 3 (8.1)         | 47 (30.1)       | 0.006  |
| ≥37                        | 34 (91.9)       | 109 (69.9)      |        |
| CEA (ng/mL), median (IQR)  | 2.45 (13.64)    | 3.10 (8.58)     | 0.821  |
| ≤5                         | 24 (61.5)       | 99 (62.7)       | 0.897  |
| >5                         | 15 (38.5)       | 59 (37.3)       |        |
| Biliary drainage           |                 |                 | 0.014  |
| None                       | 21 (48.8)       | 111 (69.8)      |        |
| Internal stenting          | 4 (9.3)         | 9 (5.7)         |        |
| PTCD                       | 18 (41.9)       | 33 (20.8)       |        |
| Both                       | 0               | 6 (3.8)         |        |
| Tumor involvement          |                 |                 |        |
| Primary tumor              |                 |                 | >0.999 |
| No                         | 3 (7.0)         | 12 (7.5)        |        |
| Yes                        | 40 (93.0)       | 147 (92.5)      |        |
| Regional lymphadenopathy   |                 |                 | 0.930  |
| No                         | 16 (37.2)       | 58 (36.5)       |        |
| Yes                        | 27 (62.8)       | 101 (63.5)      |        |
| Lung                       |                 |                 | 0.023  |
| No                         | 41 (95.3)       | 129 (81.1)      |        |
| Yes                        | 2 (4.7)         | 30 (18.9)       |        |
| Bone                       |                 |                 | 0.201  |
| No                         | 42 (97.7)       | 144 (90.6)      |        |
| Yes                        | 1 (2.3)         | 15 (9.4)        |        |
| Liver                      |                 |                 | 0.390  |
| No                         | 28 (65.1)       | 92 (57.9)       |        |
| Yes                        | 15 (34.9)       | 67 (42.1)       |        |
| Peritoneum                 |                 |                 | 0.304  |
| No                         | 38 (88.4)       | 130 (81.8)      |        |
| Yes                        | 5 (11.6)        | 29 (18.2)       |        |
| Distant lymphadenopathy    |                 |                 | 0.377  |
| No                         | 39 (90.7)       | 136 (85.5)      |        |
| Yes                        | 4 (9.3)         | 23 (14.5)       |        |
| Response                   |                 |                 | 0.468  |
| CR/RR                      | 6 (14.0)        | 18 (11.3)       |        |
| SD                         | 8 (18.6)        | 17 (10.7)       |        |
| PD                         | 15 (34.9)       | 69 (43.4)       |        |
| NA                         | 14 (32.6)       | 55 (34.6)       |        |

IQR, interquartile range, CR, complete response; PR, partial response; SD, stable disease, PD, progressive disease, NA, not assessed; ALP, alkaline phosphatase; ALT, alanine aminotransferase; NLR, neutrophil to lymphocyte ratio; MLR, monocyte to lymphocyte ratio; PLR, platelet to lymphocyte ratio, LAP, Lymphadenopathy, PTCD, percutaneous transhepatic cholangiography drainage; ICCA, intrahepatic cholangiocarcinoma; ECCA, extrahepatic cholangiocarcinoma; GB: gallbladder; CEA, carcinoembryonic antigen.
